# Supplementary material for: Pretreatment Radiologically Enlarged Lymph Nodes as a Significant Prognostic Factor in Clinical Stage IIB Cervical Cancer: Evidence from a Taiwanese Tertiary Care Center in Reaching Consensus
Source: MDPI journal article supplement (doi:10.3390/diagnostics12051230), 2022-05-14
Supplement: s1 [file s1]

**Table S3.** The OS rates of LN and non-LN groups from clinical stage IIB CC.

| OS_time_mo | OS_LN_Yes | OS_LowCI95_LN_Yes | OS_UpperCI95_LN_Yes | OS_LN_No | OS_LowCI95_LN_No | OS_UpperCI95_LN_No |
|------------|-----------|-------------------|---------------------|----------|------------------|--------------------|
| 6          | 0.939     | 0.779             | 0.984               | 1        | 1                | 1                  |
| 12         | 0.788     | 0.606             | 0.893               | 0.974    | 0.832            | 0.996              |
| 18         | 0.697     | 0.51              | 0.824               | 0.921    | 0.774            | 0.974              |
| 24         | 0.667     | 0.479             | 0.8                 | 0.921    | 0.774            | 0.974              |
| 30         | 0.635     | 0.447             | 0.774               | 0.893    | 0.739            | 0.959              |
| 36         | 0.568     | 0.381             | 0.718               | 0.865    | 0.705            | 0.942              |
| 42         | 0.568     | 0.381             | 0.718               | 0.865    | 0.705            | 0.942              |
| 48         | 0.462     | 0.281             | 0.624               | 0.807    | 0.637            | 0.903              |
| 54         | 0.423     | 0.247             | 0.59                | 0.807    | 0.637            | 0.903              |
| 60         | 0.381     | 0.209             | 0.552               | 0.767    | 0.583            | 0.878              |
