# Supplementary material for: Pretreatment Radiologically Enlarged Lymph Nodes as a Significant Prognostic Factor in Clinical Stage IIB Cervical Cancer: Evidence from a Taiwanese Tertiary Care Center in Reaching Consensus
Source: MDPI journal article supplement (doi:10.3390/diagnostics12051230), 2022-05-14
Supplement: s1 [file s1]

**Table S1.** Shapiro-Wilk's test shows the normal distribution for all continuous variables.

|        | <b>Age w-value</b> | <b>Size w-value</b> | <b>Age p-value</b> | <b>Size p-value</b> |
|--------|--------------------|---------------------|--------------------|---------------------|
| Total  | 0.985              | 0.981               | 0.5524             | 0.501               |
| LN     | 0.985              | 0.969               | 0.9176             | 0.585               |
| non-LN | 0.948              | 0.972               | 0.0682             | 0.542               |
