# Supplementary material for: Pretreatment Radiologically Enlarged Lymph Nodes as a Significant Prognostic Factor in Clinical Stage IIB Cervical Cancer: Evidence from a Taiwanese Tertiary Care Center in Reaching Consensus
Source: MDPI journal article supplement (doi:10.3390/diagnostics12051230), 2022-05-14
Supplement: s1 [file s1]

**Table S2.** The PFS rates of LN and non-LN groups from clinical stage IIB CC.

| PFS_time_mo | PFS_LN_Yes | PFS_LowCI95_LN_Yes | PFS_UpperCI95_LN_Yes | PFS_LN_No | PFS_LowCI95_LN_No | PFS_UpperCI95_LN_No |
|-------------|------------|--------------------|----------------------|-----------|-------------------|---------------------|
| 6           | 0.758      | 0.573              | 0.871                | 0.974     | 0.832             | 0.996               |
| 12          | 0.697      | 0.51               | 0.824                | 0.948     | 0.808             | 0.987               |
| 18          | 0.667      | 0.479              | 0.8                  | 0.895     | 0.745             | 0.959               |
| 24          | 0.635      | 0.447              | 0.774                | 0.895     | 0.745             | 0.959               |
| 30          | 0.6        | 0.411              | 0.745                | 0.836     | 0.669             | 0.923               |
| 36          | 0.56       | 0.369              | 0.713                | 0.836     | 0.669             | 0.923               |
| 42          | 0.517      | 0.325              | 0.678                | 0.836     | 0.669             | 0.923               |
| 48          | 0.47       | 0.279              | 0.64                 | 0.805     | 0.632             | 0.902               |
| 54          | 0.47       | 0.279              | 0.64                 | 0.771     | 0.592             | 0.879               |
| 60          | 0.47       | 0.279              | 0.64                 | 0.726     | 0.531             | 0.85                |
